# Supplementary material for: Peripheral blood CD4+CD25+CD127low regulatory T cells are significantly increased by tocilizumab treatment in patients with rheumatoid arthritis: increase in regulatory T cells correlates with clinical response
Source: PubMed Central journal article supplement (PMC4332922; doi:10.1186/s13075-015-0526-4), 2015-01-21
Supplement: 13075_2015_526_MOESM1_ESM.pdf [file 13075_2015_526_MOESM1_ESM.pdf]

## Additional file 1

**Table S1.** Identified subsets of peripheral blood mononuclear cells defined using cell-surface markers

| Identified subsets              | Definition by cell-surface markers                                                        |
|---------------------------------|-------------------------------------------------------------------------------------------|
| CD4 <sup>+</sup> T cells        | CD3 <sup>+</sup> CD4 <sup>+</sup>                                                         |
| Naïve CD4 <sup>+</sup> T cells  | CD3 <sup>+</sup> CD4 <sup>+</sup> CD45RO <sup>-</sup>                                     |
| Memory CD4 <sup>+</sup> T cells | CD3 <sup>+</sup> CD4 <sup>+</sup> CD45RO <sup>+</sup>                                     |
| T <sub>reg</sub> cells          | CD3 <sup>+</sup> CD4 <sup>+</sup> CD25 <sup>+</sup> CD127 <sup>low</sup>                  |
| T <sub>h</sub> 1 cells          | CD3 <sup>+</sup> CD4 <sup>+</sup> CXCR3 <sup>+</sup> CCR6 <sup>-</sup>                    |
| T <sub>h</sub> 2 cells          | CD3 <sup>+</sup> CD4 <sup>+</sup> CXCR3 <sup>-</sup> CCR6 <sup>-</sup>                    |
| T <sub>h</sub> 17 cells         | CD3 <sup>+</sup> CD4 <sup>+</sup> CXCR3 <sup>-</sup> CCR6 <sup>+</sup> CD161 <sup>+</sup> |
| CD8 <sup>+</sup> T cells        | CD3 <sup>+</sup> CD8 <sup>+</sup>                                                         |
| Naïve CD8 <sup>+</sup> T cells  | CD3 <sup>+</sup> CD8 <sup>+</sup> CD45RO <sup>-</sup>                                     |
| Memory CD8 <sup>+</sup> T cells | CD3 <sup>+</sup> CD8 <sup>+</sup> CD45RO <sup>+</sup>                                     |
| B cells                         | CD3 <sup>-</sup> CD20 <sup>+</sup>                                                        |
| Naïve B cells                   | CD3 <sup>-</sup> CD20 <sup>+</sup> CD27 <sup>-</sup>                                      |
| Memory B cells                  | CD3 <sup>-</sup> CD20 <sup>+</sup> CD27 <sup>+</sup>                                      |
| Natural Killer cells            | CD3 <sup>-</sup> CD56 <sup>+</sup>                                                        |
| Non-classical monocytes         | CD3 <sup>-</sup> CD14 <sup>+</sup> CD16 <sup>+</sup>                                      |
| Classical monocytes             | CD3 <sup>-</sup> CD14 <sup>+</sup> CD16 <sup>-</sup>                                      |

**Table S2.** Correlations between peripheral T cell subsets and serum markers, composite measures of disease activity, and Health Assessment Questionnaire-Disability Index score at baseline. Spearman rank correlation coefficient was used for analysis.

|                                                                            | RF     | ACPA   | CRP    | TJC   | SJC    | D-VAS | Pt-VAS | HAQ-DI | CDAI   | SDAI   |
|----------------------------------------------------------------------------|--------|--------|--------|-------|--------|-------|--------|--------|--------|--------|
| <b>CD4<sup>+</sup> T cells / lymphocytes</b>                               | -0.14  | -0.22  | 0.07   | -0.08 | 0.08   | 0.00  | -0.10  | -0.08  | 0.00   | 0.01   |
| <b>Naïve CD4<sup>+</sup> T cells / CD4<sup>+</sup> T cells</b>             | -0.07  | 0.11   | -0.23  | -0.05 | 0.01   | -0.07 | -0.27  | 0.03   | -0.11  | -0.15  |
| <b>Memory CD4<sup>+</sup> T cells / CD4<sup>+</sup> T cells</b>            | 0.07   | -0.11  | 0.23   | 0.05  | -0.01  | 0.07  | 0.27   | -0.03  | 0.11   | 0.15   |
| <b>HLA-DR<sup>+</sup>CD4<sup>+</sup> T cells / CD4<sup>+</sup> T cells</b> | -0.25  | -0.08  | 0.17   | 0.04  | 0.15   | 0.15  | 0.17   | -0.05  | 0.23   | 0.24   |
| <b>CD38<sup>+</sup>CD4<sup>+</sup> T cells / CD4<sup>+</sup> T cells</b>   | -0.10  | -0.07  | -0.27  | -0.09 | -0.08  | -0.13 | -0.17  | -0.15  | -0.17  | -0.20  |
| <b>CD69<sup>+</sup>CD4<sup>+</sup> T cells / CD4<sup>+</sup> T cells</b>   | -0.03  | 0.28   | -0.09  | -0.07 | -0.02  | -0.11 | -0.29  | -0.23  | -0.13  | -0.14  |
| <b>CD8<sup>+</sup> T cells / lymphocytes</b>                               | 0.15   | -0.01  | -0.04  | 0.08  | 0.21   | 0.15  | 0.05   | 0.21   | 0.16   | 0.15   |
| <b>Naïve CD8<sup>+</sup> T cells / CD8<sup>+</sup> T cells</b>             | 0.35*  | 0.31*  | 0.14   | 0.26  | 0.34*  | 0.22  | 0.18   | 0.25   | 0.37*  | 0.33*  |
| <b>Memory CD8<sup>+</sup> T cells / CD8<sup>+</sup> T cells</b>            | -0.35* | -0.31* | -0.14  | -0.26 | -0.34* | -0.22 | -0.18  | -0.25  | -0.37* | -0.33* |
| <b>HLA-DR<sup>+</sup>CD8<sup>+</sup> T cells / CD8<sup>+</sup> T cells</b> | 0.00   | -0.07  | 0.41*  | 0.12  | 0.19   | 0.18  | 0.34*  | 0.30*  | 0.29   | 0.34*  |
| <b>CD38<sup>+</sup>CD8<sup>+</sup> T cells / CD8<sup>+</sup> T cells</b>   | -0.07  | -0.15  | 0.23   | 0.10  | 0.07   | -0.08 | 0.20   | -0.11  | 0.08   | 0.12   |
| <b>CD69<sup>+</sup>CD8<sup>+</sup> T cells / CD8<sup>+</sup> T cells</b>   | 0.07   | 0.00   | -0.22  | 0.00  | -0.24  | -0.11 | -0.11  | -0.07  | -0.19  | -0.20  |
| <b>T<sub>reg</sub> / CD4<sup>+</sup> T cells</b>                           | 0.09   | -0.07  | 0.07   | 0.21  | 0.30*  | -0.09 | 0.05   | 0.00   | 0.15   | 0.11   |
| <b>Naïve T<sub>reg</sub> / T<sub>reg</sub></b>                             | 0.06   | -0.01  | 0.42*  | -0.11 | 0.12   | 0.09  | 0.14   | -0.07  | 0.10   | 0.16   |
| <b>Memory T<sub>reg</sub> / T<sub>reg</sub></b>                            | -0.06  | 0.01   | -0.42* | 0.11  | -0.12  | -0.09 | -0.14  | 0.07   | -0.10  | -0.16  |
| <b>HLA-DR<sup>+</sup> T<sub>reg</sub> / T<sub>reg</sub></b>                | 0.21   | -0.09  | 0.08   | 0.08  | -0.15  | 0.16  | 0.37*  | 0.17   | 0.10   | 0.10   |
| <b>T<sub>h</sub>1 / CD4<sup>+</sup> T cells</b>                            | 0.21   | 0.04   | 0.06   | 0.09  | 0.09   | 0.17  | -0.04  | 0.09   | 0.09   | 0.05   |
| <b>HLA-DR<sup>+</sup> T<sub>h</sub>1 / T<sub>h</sub>1</b>                  | -0.11  | 0.26   | 0.11   | -0.25 | 0.03   | -0.05 | -0.28  | -0.17  | -0.15  | -0.14  |
| <b>T<sub>h</sub>2 / CD4<sup>+</sup> T cells</b>                            | 0.31   | 0.12   | 0.11   | 0.37* | 0.24   | 0.32* | 0.35*  | 0.29   | 0.37*  | 0.36*  |
| <b>HLA-DR<sup>+</sup> T<sub>h</sub>2 / T<sub>h</sub>2</b>                  | -0.18  | 0.00   | -0.28  | -0.19 | -0.22  | -0.10 | -0.05  | -0.12  | -0.22  | -0.23  |
| <b>T<sub>h</sub>17 / CD4<sup>+</sup> T cells</b>                           | 0.08   | 0.00   | -0.22  | 0.00  | -0.23  | -0.10 | -0.11  | -0.07  | -0.19  | -0.19  |
| <b>HLA-DR<sup>+</sup> T<sub>h</sub>17 / T<sub>h</sub>17</b>                | 0.05   | -0.21  | -0.14  | 0.07  | 0.24   | 0.10  | -0.04  | -0.31  | 0.11   | 0.07   |

\* $P < 0.05$

ACPA, anti-citrullinated protein antibody; CRP, C-reactive protein; HAQ-DI, Health Assessment Questionnaire Disability Index; RF, rheumatoid factor; SJC, swollen joint count; TJC, tender joint count.

**Table S3.** Correlations between peripheral B cell subsets, NK cells and monocyte subsets and serum markers, composite measures of disease activity, and Health Assessment Questionnaire-Disability Index score at baseline. Spearman rank correlation coefficient was used for analysis.

|                                                                                   | RF    | ACPA  | CRP    | TJC   | SJC   | D-VAS | Pt-VAS | HAQ-DI | CDAI  | SDAI  |
|-----------------------------------------------------------------------------------|-------|-------|--------|-------|-------|-------|--------|--------|-------|-------|
| <b>B cells / lymphocytes</b>                                                      | -0.01 | 0.02  | 0.16   | -0.14 | 0.09  | 0.03  | -0.02  | 0.11   | -0.04 | -0.04 |
| <b>CD80<sup>+</sup> B cells / B cells</b>                                         | -0.01 | 0.04  | 0.01   | 0.17  | 0.14  | 0.06  | 0.09   | 0.00   | 0.15  | 0.12  |
| <b>CD86<sup>+</sup> B cells / B cells</b>                                         | 0.08  | 0.22  | 0.24   | -0.09 | -0.06 | -0.02 | -0.02  | 0.11   | -0.07 | -0.02 |
| <b>HLA-DR<sup>+</sup> B cells / B cells</b>                                       | -0.25 | 0.05  | -0.16  | -0.09 | 0.01  | -0.07 | -0.16  | -0.14  | -0.11 | -0.13 |
| <b>Naïve B cells / B cells</b>                                                    | 0.22  | 0.26  | 0.43*  | 0.22  | 0.11  | -0.01 | 0.23   | 0.28   | 0.20  | 0.22  |
| <b>Memory B cells / B cells</b>                                                   | -0.22 | -0.26 | -0.43* | -0.22 | -0.11 | 0.01  | -0.23  | -0.28  | -0.20 | -0.22 |
| <b>NK cells / lymphocytes</b>                                                     | -0.21 | -0.01 | -0.10  | -0.23 | -0.30 | -0.21 | -0.06  | -0.12  | -0.24 | -0.25 |
| <b>CD80<sup>+</sup> CD14<sup>+</sup> monocytes / CD14<sup>+</sup> monocytes</b>   | -0.15 | 0.06  | -0.06  | 0.04  | -0.20 | -0.22 | -0.12  | -0.24  | -0.18 | -0.18 |
| <b>CD86<sup>+</sup> CD14<sup>+</sup> monocytes / CD14<sup>+</sup> monocytes</b>   | -0.01 | 0.10  | -0.09  | 0.37  | 0.23  | 0.01  | 0.14   | -0.01  | 0.27  | 0.21  |
| <b>HLA-DR<sup>+</sup> CD14<sup>+</sup> monocytes / CD14<sup>+</sup> monocytes</b> | 0.09  | 0.05  | -0.11  | 0.13  | -0.06 | 0.11  | 0.22   | 0.06   | 0.10  | 0.08  |
| <b>CD69<sup>+</sup> CD14<sup>+</sup> monocytes / CD14<sup>+</sup> monocytes</b>   | -0.16 | -0.06 | 0.01   | -0.14 | -0.28 | -0.23 | -0.30* | -0.17  | -0.27 | -0.26 |
| <b>CD16<sup>+</sup> CD14<sup>+</sup> monocytes / CD14<sup>+</sup> monocytes</b>   | 0.24  | 0.20  | 0.17   | -0.01 | 0.03  | 0.06  | 0.17   | 0.37*  | 0.06  | 0.11  |
| <b>CD16<sup>-</sup> CD14<sup>+</sup> monocytes / CD14<sup>+</sup> monocytes</b>   | -0.25 | -0.20 | -0.17  | 0.01  | -0.03 | -0.06 | -0.17  | -0.37* | -0.06 | -0.11 |

\* $P < 0.05$

ACPA, anti-citrullinated protein antibody; CRP, C-reactive protein; HAQ-DI, Health Assessment Questionnaire Disability Index; RF, rheumatoid factor; SJC, swollen joint count; TJC, tender joint count.

**Figure S1.** Gating strategy for flowcytometry analysis of T<sub>reg</sub> and subsets of monocytes

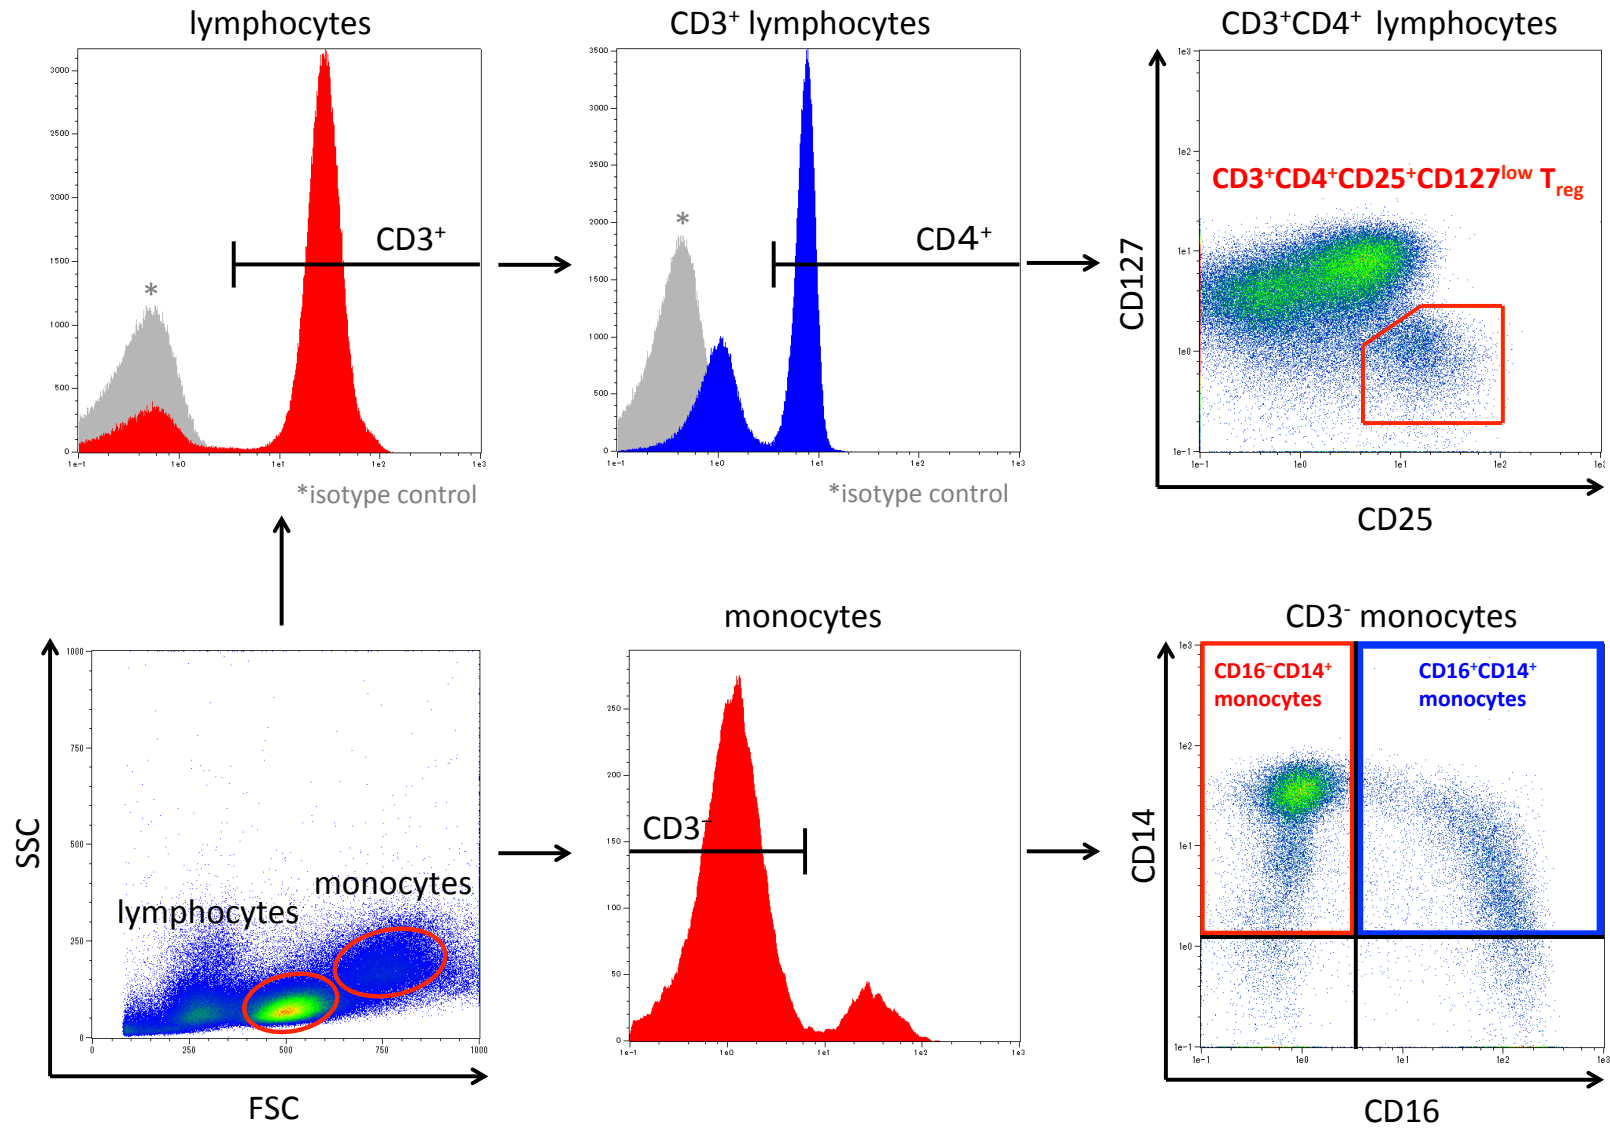

**Figure S2.** Chronological changes in and proportion of clinical activity from baseline until Week 52 of TCZ treatment. R, remission; L, low disease activity; M, moderate disease activity; H, high disease activity; CDAI, Clinical Disease Activity Index; SDAI, Simplified Disease Activity Index.

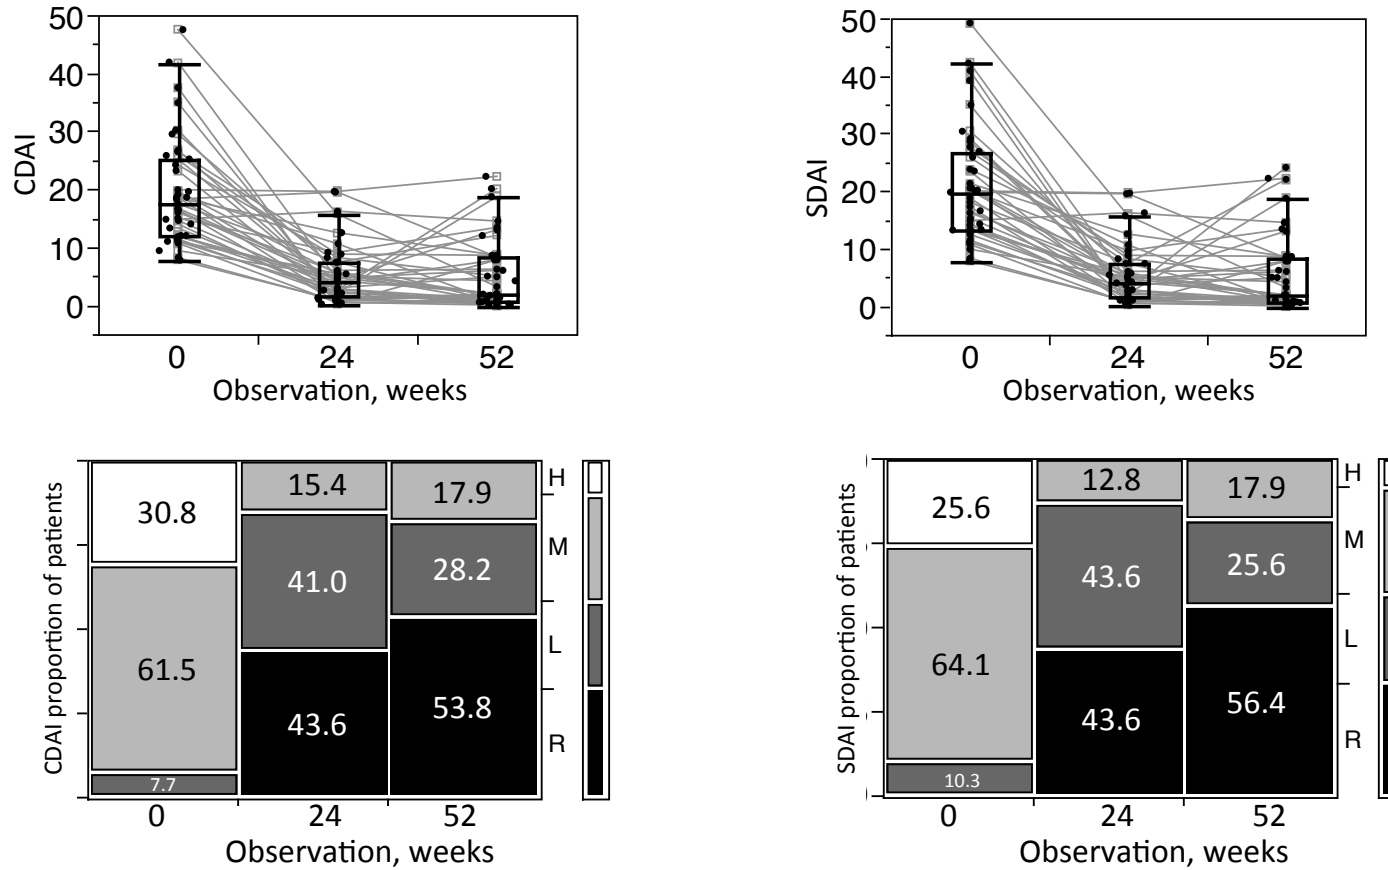

**Table S4.** Baseline demographics and clinical characteristics of the patients treated with MTX

| <b>Patient Characteristics, n=12</b> | <b>Mean <math>\pm</math> SD or Number (%)</b> | <b>Median (IQR)</b> |
|--------------------------------------|-----------------------------------------------|---------------------|
| Age, years                           | 57.6 $\pm$ 12.5                               | 58.0 (45.0–71.0)    |
| Female, n (%)                        | 9 (75.0)                                      | –                   |
| Disease duration, years              | 25.7 $\pm$ 45.4                               | 11 (2.3–29.3)       |
| Dose of methotrexate, mg/week        | 7.3 $\pm$ 1.0                                 | 8.0 (6.0–8.0)       |
| Concomitant glucocorticoid, n (%)    | 0 (0)                                         | –                   |
| SDAI                                 | 29.6 $\pm$ 12.1                               | 23.7 (21.6–39.5)    |
| CDAI                                 | 28.6 $\pm$ 11.5                               | 23.1 (21.4–38.1)    |
| RF positive, n (%)                   | 8 (66.7)                                      | –                   |
| ACPA positive, n (%)                 | 6 (50.0)                                      | –                   |
| CRP, mg/dl                           | 0.98 $\pm$ 0.92                               | 0.7 (0.2–1.9)       |
| ESR, mm/h                            | 52.0 $\pm$ 32.7                               | 45.5 (25.8–76.8)    |
| MMP-3, ng/ml                         | 112.7 $\pm$ 112.6                             | 69.5 (43.3–162.8)   |
| HAQ-DI                               | 0.7 $\pm$ 0.8                                 | 0.63 (0.1–1.2)      |

ACPA, anti-citrullinated protein antibody; CDAI, Clinical Disease Activity Index; CRP, C-reactive protein; ESR, erythrocyte sedimentation rate; HAQ-DI, Health Assessment Questionnaire Disability Index score; MMP-3, matrix metalloproteinase 3; MTX, methotrexate; RF, rheumatoid factor; SDAI, simplified disease activity index

**Figure S3.** Chronological changes in clinical activity from baseline until Week 52 of MTX treatment. CDAI, Clinical Disease Activity Index; SDAI, Simplified Disease Activity Index.

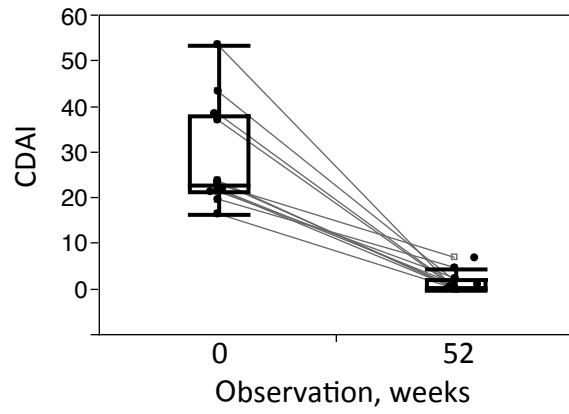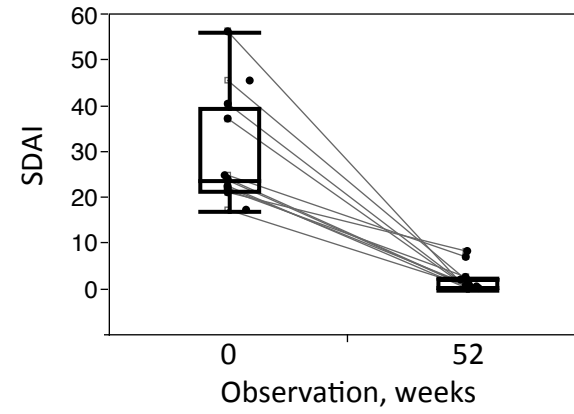

**Figure S4.** Relations between effects of MTX on the proportion of  $T_{reg}$  and clinical responses. **(A)** Chronological change in the proportion of  $T_{reg}$  among  $CD4^+$  T cells from baseline to Week 52 of MTX treatment. **(B)** The relations between the change in clinical activities ( $\Delta CDAI$  and  $\Delta SDAI$ ) and the change in proportion of  $T_{reg}$  among  $CD4^+$  T cells ( $\Delta T_{reg} / CD4$ ) at Week 52. The squares signify medians and interquartile ranges.

Data were analyzed by Kruskal-Wallis's test in **A**; Spearman's rank correlation coefficient in **B**.

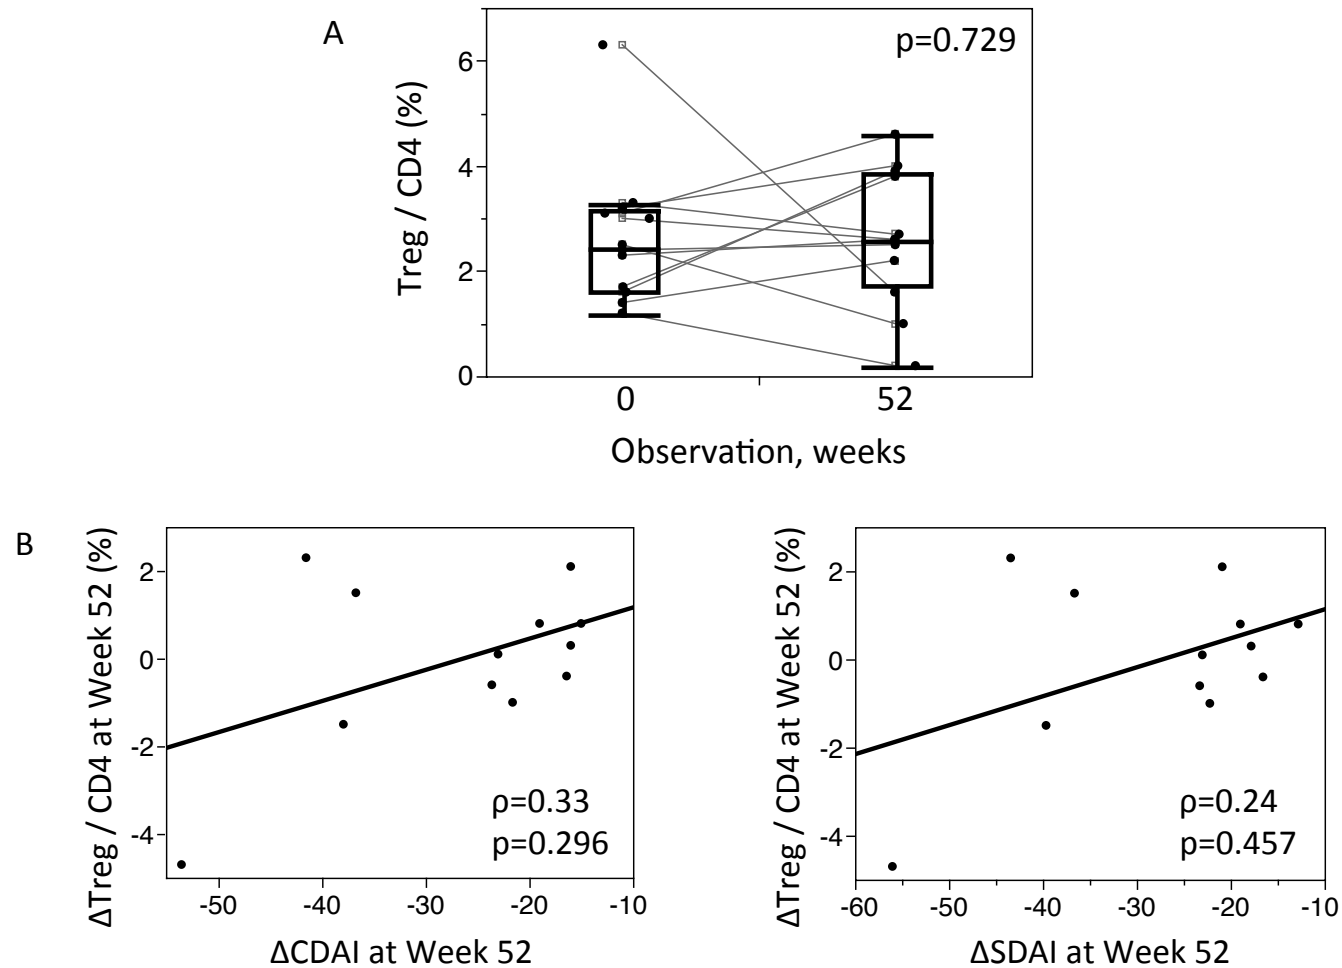



**Table S5.** Changes in proportions (%) of subsets and surface markers of B cells and monocytes during MTX treatment. Subsets and surface markers were selected as the changed ones in TCZ therapy.

| Subsets and surface markers                                                   | Median (IQR)     |                  | Baseline vs. Week 52 |
|-------------------------------------------------------------------------------|------------------|------------------|----------------------|
|                                                                               | Baseline         | Week 52          | <i>P</i> -value      |
| CD80 <sup>+</sup> B cells / B cells                                           | 10.6 (6.3–13.6)  | 9.4 (5.3–14.3)   | 0.817                |
| CD86 <sup>+</sup> B cells / B cells                                           | 74.3 (63.7–84.7) | 75.8 (60.5–78.6) | 0.729                |
| Naïve B cells / B cells                                                       | 65.6 (63.5–74.0) | 74.8 (72.1–84.0) | 0.073                |
| Memory B cells / B cells                                                      | 34.5 (27.1–36.5) | 25.2 (15.8–28.3) | 0.065                |
| HLA-DR <sup>+</sup> CD14 <sup>+</sup> monocytes / CD14 <sup>+</sup> monocytes | 67.1 (57.6–75.2) | 66.2 (61.5–72.8) | 0.921                |
| CD69 <sup>+</sup> CD14 <sup>+</sup> monocytes / CD14 <sup>+</sup> monocytes   | 92.4 (87.5–94.5) | 94.8 (93.0–96.0) | 0.106                |
| CD16 <sup>+</sup> CD14 <sup>+</sup> monocytes / CD14 <sup>+</sup> monocytes   | 26.4 (17.6–33.2) | 16.9 (8.7–27.7)  | 0.057                |
| CD16 <sup>-</sup> CD14 <sup>+</sup> monocytes / CD14 <sup>+</sup> monocytes   | 73.6 (66.8–82.4) | 83.1 (72.3–91.3) | 0.057                |
